# Supplementary material for: TFF1 Promotes EMT-Like Changes through an Auto-Induction Mechanism
Source: PubMed Central journal article supplement (PMC6073196; doi:10.3390/ijms19072018), 2018-07-11
Supplement: ijms-19-02018-s001.pdf [file ijms-19-02018-s001.pdf]

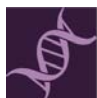

# TFF1 Promotes EMT-Like Changes through an Auto-Induction Mechanism

## Supplementary Materials

**Table S1.** Primers sequences used for real-time PCR analysis.

| Gene       | Forward (5'-3')        | Reverse (5'-3')        | T annealing °C |
|------------|------------------------|------------------------|----------------|
| E-CADHERIN | TCCCCAACTCCTCTCCTG     | AAACCTTGCCCTTCTTGTC    | 58             |
| HPRT1      | GACCAGTCAACAGGGACAT    | CCTGACCAAGGAAAAGCAAAG  | 60             |
| NANOG      | CAGTCTGGACACTGGCTGAA   | CTCGCTGATTAGGCTCCAAC   | 60             |
| SNAIL      | TGCCCTCAAGATGCACATCCGA | GGGACAGGAGAAGGGCTTCTC  | 60             |
| TFF1       | GGACGTCGATGGTATTAGGATA | AGGAGGTAATGGCCACCATGGA | 58             |
| VIMENTIN   | CTCCGGGAGAAAATTGCAGGA  | TCAAGGTCAAGACGTGCCA    | 60             |
| ZEB1       | GCCAATAAGCAAACGATTCTG  | TTTGGCTGGATCACTTTCAAG  | 60             |

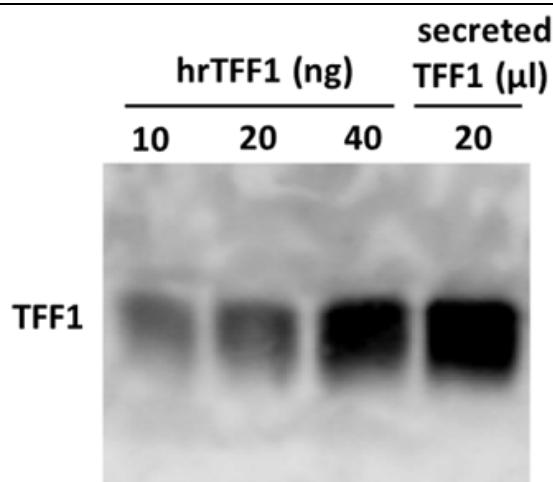

**Figure S1.** Western blot analysis of human recombinant TFF1 protein (10, 20 and 40 ng) and TFF1 secreted protein in AGS-AC1 supernatant after doxycycline induction (20  $\mu$ l).

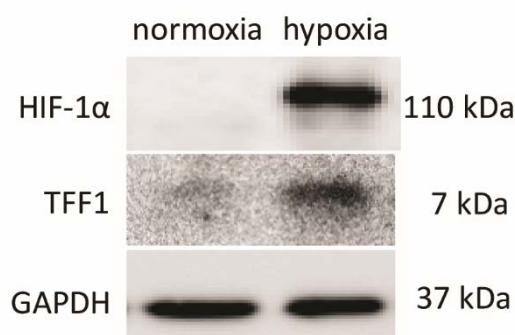

**Figure S2.** Western blot analysis of HIF-1 $\alpha$  and TFF1 protein levels in AGS cell line under normoxic and hypoxic conditions.

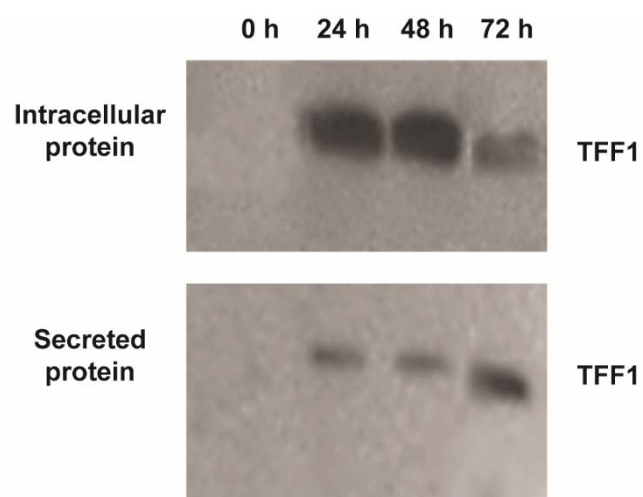

**Figure S3.** Time course analysis of TFF1 production in AGS AC1 cell line performed on intracellular and secreted protein at different times from induction with Doxycycline.
